# Supplementary material
Source: PubMed Central journal article supplement (PMC7233485)
Supplement: MMBR.00095-19-s0001.pdf [file MMBR.00095-19-s0001.pdf]

1 **SUPPLEMENTARY TABLES**

2 **Supplementary Table 1. Variations of Serbo-Croatian author names used for Marburg virus disease literature research and found in Marburg**  
 3 **virus disease literature**

| Search terms used                                                                                       | Correct Cyrillic Serbo-Croatian spelling | Correct Latin Serbo-Croatian spelling | Incorrect spelling variations found in the Marburg virus disease literature |
|---------------------------------------------------------------------------------------------------------|------------------------------------------|---------------------------------------|-----------------------------------------------------------------------------|
| Beric, Berić, Berich, Beritch, Берић                                                                    | Берић, Б. (Б.)                           | Berić, B. (B.) (1)                    |                                                                             |
| Bordoski, Bordjoski, Bordoshki, Bordjoshki, Borđoški, Борђошки, Борджоски, Боджоски                     | Борђошки, М. (Н.) (2)                    | Borđoški, M. (N.) (3, 4)              | Bordjoški, M. (5)                                                           |
| Gligic, Gligić, Gligich, Gligitch, Глигић                                                               | Глигић, А. (С.) (2)                      | Gligić, A. (S.) (3-5)                 |                                                                             |
| Klasnia, Klasnja, Klašnja, Klashnia, Klashnja, Клашња                                                   | Клашња, Р. (2)                           | Klašnja, R. (2, 6)                    |                                                                             |
| Mocic, Mocić, Mocich, Mocitch, Моцић                                                                    | Моцић, М. (2)                            | Mocić, M. (2)                         | Mocitch, M. (6)                                                             |
| Stefanovic, Stefanović, Stefanovich, Stefanovitch, Стефановић                                           | Стефановић, Ж. (2)                       | Stefanović, Ž. (1, 3, 5)              | Stefanovic, Z. (4)                                                          |
| Stoikovic, Stoikovich, Stoikovitch, Stojkovic, Stojković, Stojkovich, Stojkovitch, Стојковић, Стойкович | Стојковић, Љ. (В.) (2)                   | Stojković, Lj. (V.) (1, 3-5)          | Stoikovic, L. V. (7)                                                        |
| Todorovic, Todorović, Todorovich, Todorovitch, Тодоровић                                                | Тодоровић, К. (П.) (2)                   | Todorović, K. P. (2)                  | Todorovitch, K. (6)                                                         |

- 5 **Supplementary Table 2. Data discrepancies between publications describing the 1967 Marburg virus disease outbreak in Yugoslavia.** Green  
 6 color indicates retrospective verification of events and data.

| Reference/data point                               | (8) | (5)                                                                                                                                       | (2)           | (6)           | (1)                   | (7)                                                                                   |
|----------------------------------------------------|-----|-------------------------------------------------------------------------------------------------------------------------------------------|---------------|---------------|-----------------------|---------------------------------------------------------------------------------------|
| <b>Grivet shipments from Uganda to Yugoslavia</b>  |     | “The first and third shipment went through London airport, while the second one came to Belgrade, only with a change of plane in München” |               |               |                       | “2 of those 3 shipments went through London Airport, and 1 came directly to Belgrade” |
| <b>Grivet shipment dates</b>                       |     | “From July 18 till August 1...”                                                                                                           |               |               | 08/10/1967–08/25/1967 | “between 18 July and 1 August”                                                        |
| <b>Grivet necropsies performed by veterinarian</b> |     | Necropsies on 2 and 1 deceased grivets are performed by the veterinarian on August 25 and August 30, respectively.                        | 5             | 5             | 5                     |                                                                                       |
| <b>Veterinarian identification</b>                 |     | Ž. S.                                                                                                                                     | Ж. Ст./Ž. St. | Ж. Ст./Ž. St. |                       |                                                                                       |
| <b>Veterinarian age</b>                            |     |                                                                                                                                           | 45            | 44            |                       |                                                                                       |

|                                   |                    |                    |                                                                                                                                                                                                                                                                                                                                                                                                                                                                                                                                                                                                                                                                                                   |                                                                                                                                                                                                                                                                                                                                 |  |  |
|-----------------------------------|--------------------|--------------------|---------------------------------------------------------------------------------------------------------------------------------------------------------------------------------------------------------------------------------------------------------------------------------------------------------------------------------------------------------------------------------------------------------------------------------------------------------------------------------------------------------------------------------------------------------------------------------------------------------------------------------------------------------------------------------------------------|---------------------------------------------------------------------------------------------------------------------------------------------------------------------------------------------------------------------------------------------------------------------------------------------------------------------------------|--|--|
| <b>Veterinarian disease onset</b> | <b>September 2</b> | <b>September 1</b> | <p>“Његова садашња болест је почела по повратку из града, 1. септембра 67., са језом и дрхтавцом. Температуру није мерио а ноћ је провео мирно. Следећег јутра је температура била 38°6С без неких нарочито испољених тегоба, а одлекова је узимао само Ацисал-таблете. Пошто је целог наредног дана температура била висока — 39,6°С —...” [His present illness began on his return from the city, on September 1, 1967, with fever and chills. He did not measure temperature and spent the night calmly. The next morning, the temperature was 38.6°С in the absence of any major complains, and he only took aspirin tablets because the temperature was high the next day — 39.6°С —...]</p> | <p>“The disease began on September 1, 1967, with general weakness and raised temperature (38.6–39.6°С) without other clinical symptoms”</p> <p>vs.</p> <p>Fig. 1 in the same publication not showing fever on September 1, but instead showing the temperature values (38.6 and 39.6°С) on September 2 and 3, respectively.</p> |  |  |
|-----------------------------------|--------------------|--------------------|---------------------------------------------------------------------------------------------------------------------------------------------------------------------------------------------------------------------------------------------------------------------------------------------------------------------------------------------------------------------------------------------------------------------------------------------------------------------------------------------------------------------------------------------------------------------------------------------------------------------------------------------------------------------------------------------------|---------------------------------------------------------------------------------------------------------------------------------------------------------------------------------------------------------------------------------------------------------------------------------------------------------------------------------|--|--|

|                                                          |  |       |                                                                                                                                                                                                                                                                                                                                                                                                                                                                                                               |                                                                                                                                                                                                                                                                                                                                                                                                                 |       |  |
|----------------------------------------------------------|--|-------|---------------------------------------------------------------------------------------------------------------------------------------------------------------------------------------------------------------------------------------------------------------------------------------------------------------------------------------------------------------------------------------------------------------------------------------------------------------------------------------------------------------|-----------------------------------------------------------------------------------------------------------------------------------------------------------------------------------------------------------------------------------------------------------------------------------------------------------------------------------------------------------------------------------------------------------------|-------|--|
| <b>Veterinarian leukocytopenia</b>                       |  |       | <p>“Ујутру 4. септембра се температура спустила на 37°7С, али је почео да повраћа после узимања таблета „Б-витамина”. Тог дана је у периферној крви нађено свега 2.200 леукоцита/кмм са 68% сегментираних” [On the morning of September 4, the temperature dropped to 37.7°C, but he began to vomit after taking “vitamin B” tablets. On that day, only 2,200 leukocytes/mm<sup>3</sup> were found in peripheral blood; 68% of them segmented].</p> <p>However, there is no September 4 value in Figure 1</p> | <p>“The hematologic examinations while he was still at home showed leucopenia (<math>L = 2,200</math> cmm with 68% polynuclear, without eosinophils” and corresponding values in Figure 1</p> <p>vs.</p> <p>“On the fifth day of illness there was leuco- and thrombocytopenia (<math>L = 4,000</math>, .... 2% eosinophils;...)” whereas a 4,000 value in Figure 1 only appears at around day 9 of illness</p> |       |  |
| <b>Veterinarian’s wife identification</b>                |  | R. S. | P. Ст./R. St.                                                                                                                                                                                                                                                                                                                                                                                                                                                                                                 | N. St.                                                                                                                                                                                                                                                                                                                                                                                                          | R. S. |  |
| <b>Veterinarian’s wife age</b>                           |  |       | 44                                                                                                                                                                                                                                                                                                                                                                                                                                                                                                            | 45                                                                                                                                                                                                                                                                                                                                                                                                              | 45    |  |
| <b>Veterinarian’s wife fever on day of disease onset</b> |  |       | 37.4°C                                                                                                                                                                                                                                                                                                                                                                                                                                                                                                        | 38.6°C in the text but not showing such a value in Figure 4                                                                                                                                                                                                                                                                                                                                                     |       |  |

|                                                                                          |                            |                                 |                                                                                                                                                                                                                                                                                                                                                                                                                                                                              |                                                                |                   |  |
|------------------------------------------------------------------------------------------|----------------------------|---------------------------------|------------------------------------------------------------------------------------------------------------------------------------------------------------------------------------------------------------------------------------------------------------------------------------------------------------------------------------------------------------------------------------------------------------------------------------------------------------------------------|----------------------------------------------------------------|-------------------|--|
| <b>Transfusions</b>                                                                      |                            |                                 | <p>Veterinarian:<br/> “Конзиалијум је одлучио да се нашем болеснику да 250 ccm реконвалесцентне плазме од прездравелог болесника из Немачке” [The council decided to give our patient 250 cm<sup>3</sup> of reconvalescent plasma from a German patient]</p> <p>Veterinarian’s wife:<br/> “Примена 250 ccm плазме од реконвалесцента је и њој блина од несумњиве користи” [The administration of 250 cm<sup>3</sup> convalescent plasma is also of great benefit to her]</p> | “by applying plasma and blood serum of the recovered patients” |                   |  |
| <b>Total number of human cases</b>                                                       | 1 male, 1 female, 0 deaths |                                 | 1 male, 1 female, 0 deaths                                                                                                                                                                                                                                                                                                                                                                                                                                                   | 1 male, 1 female, 0 deaths                                     | 2 female, 1 death |  |
| <b>Serum and coagulum sampling date for first guinea pig inoculations (veterinarian)</b> |                            | September 7 (day 7 of illness)  | September 9 (day 9 of illness)                                                                                                                                                                                                                                                                                                                                                                                                                                               |                                                                |                   |  |
| <b>Serum and coagulum sampling date for first guinea pig inoculations (wife)</b>         |                            | September 13 (day 2 of illness) | September 14 (day 3 of illness)                                                                                                                                                                                                                                                                                                                                                                                                                                              |                                                                |                   |  |

|                                                                |  |                  |                                                                                          |  |                                                                         |
|----------------------------------------------------------------|--|------------------|------------------------------------------------------------------------------------------|--|-------------------------------------------------------------------------|
| <b>Size of virions observed by electron microscopy</b>         |  |                  | “дужине око 500–800 а дебљине око 80 милимикрона” [500–800 nm in length and 80 nm thick] |  | “50–800 nm in length, and about 80 nm in diameter”                      |
| <b>Titers of complement fixation antibodies in grivet sera</b> |  | 1:2–1:16 or more |                                                                                          |  | “in a titre from 1 in 2 to 1 in 32. We were not able to interpret this” |

8 **Supplementary Table 3. Key personnel involved in the investigation, management, and containment of the Marburg virus**  
 9 **disease outbreak in Belgrade, Yugoslavia, 1967 ([1-4](#), [6](#), [9](#))**

| Personnel [Cyrillic Serbo-Croatian spelling] (date of birth – date of death) | Personnel [Latin Serbo-Croatian spelling] | Affiliation at the time of the outbreak                                                                                                                                                       | Main role during the outbreaks                                                                                                                                             |
|------------------------------------------------------------------------------|-------------------------------------------|-----------------------------------------------------------------------------------------------------------------------------------------------------------------------------------------------|----------------------------------------------------------------------------------------------------------------------------------------------------------------------------|
| Берић, Берислав Б. (1927–1994)                                               | Berić, Berislav B.                        | Director, MD, University Clinic for Gynecology and Obstetrics (Univerzitetska klinika za ginekologiju i akušerstvo/Универзитетска клиника за гинекологију и акушерство), Novi Sad, Yugoslavia | Unclear. Co-authored ( <a href="#">1</a> ) together with Lj. Stojković and Ž. Stefanović, likely providing gynecological expertise in the assessment of Patient 2 (R. St.) |
| Борђошки, Марко Н. (1908–1982)                                               | Borđoški, Marko N.                        | Head, Virology Department, Institute of Immunology and Virology “Torlak” (Institut za Imunologiju i Virusologiju «Torlak»/Институт за Имунологију и Вирусологију «Торлак»)                    | Charged with planning and coordinating of all activities and personal protection measures during the outbreak                                                              |
| Бошковић, Радосав (1920–2010)                                                | Bošković, Radosav                         | Epidemiologist, Institute of Immunology and Virology “Torlak,” Belgrade, Yugoslavia                                                                                                           | Epidemiological investigations                                                                                                                                             |
| Ђорић, Радмила (1903–1971)                                                   | Đorić, Radmila                            | University Clinic of Infectious Diseases (Univerzitetska klinika za infektivne bolesti/Универзитетска клиника за инфективне болести), Belgrade, Yugoslavia                                    | Patient medical care                                                                                                                                                       |
| Глигић, Ана С. (1934–)                                                       | Gligić, Ana S.                            | Head, National Laboratory for Variola and Arboviruses, Institute of Immunology and                                                                                                            | Laboratory isolation and identification of MARV, including animal                                                                                                          |

|                                   |                        |                                                                                               |                                                                                                                                                           |
|-----------------------------------|------------------------|-----------------------------------------------------------------------------------------------|-----------------------------------------------------------------------------------------------------------------------------------------------------------|
|                                   |                        | Virology "Torlak," Belgrade, Yugoslavia                                                       | experimentation, electron microscopy, antigen preparing, and serology                                                                                     |
| Клашња, Радмила                   | Klašnja, Radmila       | MD, University of Belgrade School of Medicine                                                 | Patient medical care                                                                                                                                      |
| Моцић, Мирјана (1917–2010)        | Mocić, Mirjana         | MD                                                                                            | Patient medical care                                                                                                                                      |
| Павловић, Јован (1922–2004)       | Pavlović, Jovan        | MD, University Clinic of Infectious Diseases, Belgrade, Yugoslavia                            | Medical treatment of both patients                                                                                                                        |
| Стефановић, Живко (1922–1996)     | Stefanović, Živko      | DVM, histopathologist , Institute of Immunology and Virology "Torlak," Belgrade, Yugoslavia   | Histopathology and electron-microscopic analysis of animal tissues                                                                                        |
| Стојковић, Љубинко В. (1920–1997) | Stojković, Ljubinko V. | Director, Institute of Immunology and Virology "Torlak," Belgrade, Yugoslavia                 | Supervisor of all activities within the Institute and coordination of and communication with international authorities; electron-microscopic examinations |
| Тодоровић, Коста П. (1887–1975)   | Todorović, Kosta P.    | MD, Emeritus, Deputy Director, University Clinic of Infectious Diseases, Belgrade, Yugoslavia | Supervisor of patient medical care                                                                                                                        |



11   **REFERENCES**

- 12   1.     Berić B, Stojković Lj, Stefanović Ž. 1972. Veränderungen der weiblichen Genitalorgane im Verlauf  
13         der „Marburg-Viruskrankheit“. Zentralbl Gynäkol 94:1028-1033.
- 14   2.     Тодоровић К, Моцић М, Клашња Р, Стојковић Љ, Борђошки М, Глигић А, Стефановић Ж.  
15         1969. Непознато вирусно обољење пренето са инфицираних-оболелих мајмуна на човека.  
16         Глас. Српска академија наука и уметности, Одељење медицинских наука CCLXXV:91-101.
- 17   3.     Stojković Lj, Borđoški M, Gligić A, Stefanović Ž. 1969. Ispitivanje etiologije hemoragičke groznice  
18         izazvane kontaktom sa majmunima Cercopithecus, p 4522. *In* Tešić Ž (ed), Prvi kongres  
19         mikrobiologa Jugoslavije. Izdaje Jugoslovensko microbiološko društvo, Belgrade, Yugoslavia.
- 20   4.     Stojković Lj, Gligić A, Borđoški M, Stefanovic Z. 1968. Some data on etiology, epidemiology and  
21         epizootology of Cercopithecus-associated hemorrhagic fever. Abstracts and reviews of the  
22         Eighth International Congress on Tropical Medicine and Malaria, Teheran, Iran, September 7–15.
- 23   5.     Stojković Lj, Bordjoški M, Gligić A, Stefanović Ž. 1971. Two cases of Cercopithecus-monkeys-  
24         associated haemorrhagic fever (some data on etiology, epidemiology, and epizootiology), p 24-  
25         33. *In* Martini GA, Siegert R (ed), Marburg virus disease. Springer-Verlag, Berlin, West Germany.
- 26   6.     Todorovitch K, Mocitch M, Klašnja R. 1971. Clinical picture of two patients infected by the  
27         Marburg vervet virus, p 19-23. *In* Martini GA, Siegert R (ed), Marburg virus disease. Springer-  
28         Verlag, Berlin, West Germany.
- 29   7.     Stoikovic LV, Webb HE, Beveridge WIB, Simpson DIH, McCarthy K, Gaudin OG. 1969. Virus  
30         diseases : discussion, p 166-168. *In* Perkins FT, O'Donoghue PN, Beveridge WIB, Coid CR,  
31         Goodwin LG, Greenling CL, Smith CEG (ed), Hazards of handling simians, vol 4. London  
32         Laboratory Animals, Ltd., London, UK.
- 33   8.     Bonin O. 1969. The Cercopithecus monkey disease in Marburg and Frankfurt (Main), 1967. *Acta*  
34         Zool Pathol Antverp 48:319-31.
- 35   9.     Köppe M. 2002. Untersuchung zum Ablauf des Marburg-Virus-Ausbruches in Marburg und  
36         Frankfurt 1967. Medical dissertation. Philipps-Universität Marburg, Marburg an der Lahn,  
37         Germany.
